# Supplementary material for: Utility Assessment of Moderate to Severe Thyroid Eye Disease Health States
Source: PubMed Central journal article supplement — JAMA Ophthalmol. 2022 Dec 29;141(2):159–66. doi: 10.1001/jamaophthalmol.2022.3225 (PMC9857514; doi:10.1001/jamaophthalmol.2022.3225), 2022-12-29
Supplement: jamaophthalmol-e223225-s002.pdf [file jamaophthalmol-e223225-s002.pdf]

Smith TJ, Cockerham K, Lelli G, et al. Utility assessment of moderate to severe thyroid eye disease health states. *JAMA Ophthalmol*. Published online December 29, 2022.  
doi:10.1001/jamaophthalmol.2022.3225

## Data Sharing Statement

Data

Data available: No

Edit Delete
